# Supplementary material
Source: publisher figshare collection journal article supplement (https://frontiersin.figshare.com/ndownloader/files/20046767)
Supplement: Supplementary file [file 20046767]

**Supplemental Table 1. Subgroup analysis of predictors for bypass patency in pediatric patients.**

| Characteristics         | Bypass patency      |                  | p value |
|-------------------------|---------------------|------------------|---------|
|                         | Unobstructed (n=24) | Obstructed (n=6) | Uni     |
| Female sex              | 13(70.8%)           | 4(66.7%)         | 0.795   |
| History of risk factors |                     |                  |         |
| Hypertension            | 0(0.0%)             | 0(0.0%)          | -       |
| Smoking                 | 0(0.0%)             | 0(0.0%)          | -       |
| Diabetes                | 0(0.0%)             | 0(0.0%)          | -       |
| Alcohol use             | 0(0.0%)             | 0(0.0%)          | -       |
| Hyperlipidemia          | 0(0.0%)             | 0(0.0%)          | -       |
| Thyroid disease         | 1(4.2%)             | 0(0.0%)          | 1.000   |
| Clinical manifestation  |                     |                  |         |
| Hemorrhage              | 1(4.2%)             | 0(0.0%)          | 0.171   |
| Infarction              | 6(25.0%)            | 3(50.0%)         | 0.901   |
| Others                  | 17(70.8%)           | 3(50.0%)         |         |
| Suzuki stage            |                     |                  | 0.854   |
| I                       | 0(0.0%)             | 0(0.0%)          |         |
| II                      | 3(12.5%)            | 0(0.0%)          |         |
| III                     | 10(41.7%)           | 5(83.3%)         |         |
| IV                      | 10(41.7%)           | 1(16.7%)         |         |
| V                       | 1(4.2%)             | 0(0.0%)          |         |
| VI                      | 0(0.0%)             | 0(0.0%)          |         |
| AChA dilated            | 12(50.0%)           | 4(66.7%)         | 0.667   |
| PComA positive          | 3(12.5%)            | 1(16.7%)         | 1.000   |
| PCA involved            | 9(37.5%)            | 2 (33.3%)        | 0.808   |
| Surgical modalities     |                     |                  |         |
| DB+EDAS                 | 2(8.3%)             | 2(33.3%)         | 0.183   |
| DB+EDS                  | 11(45.8%)           | 3(50.0%)         | 0.212   |

|    |           |          |
|----|-----------|----------|
| DB | 11(45.8%) | 1(16.7%) |
|----|-----------|----------|

---

Abbreviations: AChA, anterior choroidal artery; DB, direct bypass; DB+EDS, direct bypass and encephalodurosangiosis; DB+EDAS, direct bypass and encephaloduroarteriosangiosis; CI, confidence intervals; OR, odds ratios; PCA, posterior cerebral artery; PComA, posterior communicating artery.

**Supplemental Table 2. Subgroup analysis of predictors for bypass patency in adult patients.**

| Characteristics         | Bypass patency          |                      | p value      |              | OR (95% CI)         |
|-------------------------|-------------------------|----------------------|--------------|--------------|---------------------|
|                         | Unobstructed<br>(n=108) | Obstructed<br>(n=50) | Uni          | Multi*       |                     |
| Female sex              | 57(52.8%)               | 29(58.0%)            | 0.474        |              |                     |
| History of risk factors |                         |                      |              |              |                     |
| Hypertension            | 34(31.5%)               | 13(26.0%)            | 0.077        |              |                     |
| Smoking                 | 10(12.0%)               | 4(8.0%)              | 0.963        |              |                     |
| Diabetes                | 6(5.6%)                 | 2(4.0%)              | 0.196        |              |                     |
| Alcohol use             | 8(7.4%)                 | 1(2.0%)              | 0.641        |              |                     |
| Hyperlipidemia          | 4(3.7%)                 | 2(4.0%)              | 0.503        |              |                     |
| Thyroid disease         | 1(9.3%)                 | 0(0.0%)              | 1.000        |              |                     |
| Clinical manifestation  |                         |                      |              |              |                     |
| Hemorrhage              | 27(25.0%)               | 23(46.0%)            | <b>0.014</b> | <b>0.012</b> | 0.313 (0.126-0.777) |
| Infarction              | 45(41.7%)               | 16(32.0%)            | 0.373        | 0.342        | 0.652 (0.269-1.577) |
| Others                  | 36(33.3%)               | 11(22.0%)            |              |              |                     |
| Suzuki stage            |                         |                      | 0.124        |              |                     |
| I                       | 2(1.9%)                 | 0(0.0%)              |              |              |                     |
| II                      | 14(13.0%)               | 12(24.0%)            |              |              |                     |
| III                     | 46(42.6%)               | 12(24.0%)            |              |              |                     |
| IV                      | 29(26.9%)               | 15(30.0%)            |              |              |                     |
| V                       | 15(13.9%)               | 10(20.0%)            |              |              |                     |
| VI                      | 2(1.9%)                 | 1(2.0%)              |              |              |                     |
| AChA dilated            | 33(30.6%)               | 21(42.0%)            | 0.228        |              |                     |
| PComA positive          | 8(7.4%)                 | 7(14.0%)             | 0.172        |              |                     |
| PCA involved            | 9(31.1%)                | 19(38.0%)            | 0.666        |              |                     |
| Surgical modalities     |                         |                      |              |              |                     |
| DB+EDAS                 | 20(18.5%)               | 9(18.0%)             | 0.841        | 0.156        | 0.512(0.203-1.290)  |

|        |           |           |       |       |                    |
|--------|-----------|-----------|-------|-------|--------------------|
| DB+EDS | 39(36.1%) | 22(44.0%) | 0.759 | 0.251 | 0.657(0.321-1.346) |
| DB     | 49(45.4%) | 19(38.0%) |       |       |                    |

---

\*Adjusted for surgical modalities. Boldface indicates statistical significance ( $p < 0.05$ ).

Abbreviations: AChA, anterior choroidal artery; DB, direct bypass; DB+EDS, direct bypass and encephalodurosynangiosis; DB+EDAS, direct bypass and encephaloduroarteriosynangiosis; CI, confidence intervals; OR, odds ratios; PCA, posterior cerebral artery; PComA, posterior communicating artery.

**Supplemental Table 3. Subgroup analysis of predictors for postoperative collateral formation in pediatric patients.**

| Characteristics         | PCF            |               | p value |
|-------------------------|----------------|---------------|---------|
|                         | Good<br>(n=25) | Poor<br>(n=5) |         |
| Female sex              | 14(56.0%)      | 3(60.0%)      | 0.638   |
| History of risk factors |                |               |         |
| Hypertension            | 0(0.0%)        | 0(0.0%)       | -       |
| Smoking                 | 0(0.0%)        | 0(0.0%)       | -       |
| Diabetes                | 0(0.0%)        | 0(0.0%)       | -       |
| Alcohol use             | 0(0.0%)        | 0(0.0%)       | -       |
| Hyperlipidemia          | 0(0.0%)        | 0(0.0%)       | -       |
| Thyroid disease         | 1(4.0%)        | 0(0.0%)       | 1.000   |
| Clinical manifestation  |                |               |         |
| Hemorrhage              | 1(4.0%)        | 0(0.0%)       | 0.171   |
| Infarction              | 7(28.0%)       | 2(40.0%)      | 0.155   |
| Others                  | 17(68.0%)      | 3(60.0%)      |         |
| Suzuki stage            |                |               | 0.486   |
| I                       | 0(0.0%)        | 0(0.0%)       |         |
| II                      | 3(12.0%)       | 0(0.0%)       |         |
| III                     | 11(44.0%)      | 4(80.0%)      |         |
| IV                      | 10(40.0)       | 1(20.0%)      |         |
| V                       | 1(4.0%)        | 0(0.0%)       |         |
| VI                      | 0(0.0%)        | 0(0.0%)       |         |
| PCA involved            | 10(40.0%)      | 1 (20.0%)     | 0.349   |
| AChA dilated            | 12(48.0%)      | 4(80.0%)      | 0.433   |
| PComA positive          | 3(12.0%)       | 1 (20.0%)     | 0.583   |
| Surgical modalities     |                |               |         |
| DB+EDAS                 | 3(12.0%)       | 1(20.0%)      | 0.677   |

|        |           |          |       |
|--------|-----------|----------|-------|
| DB+EDS | 11(44.0%) | 3(60.0%) | 0.831 |
| DB     | 11(44.0%) | 1(20.0%) |       |

Abbreviations: AChA, anterior choroidal artery; DB, direct bypass; DB+EDS, direct bypass and encephalodurosangiosis; DB+EDAS, direct bypass and encephaloduroarteriosangiosis; CI, confidence intervals; OR, odds ratios; PCA, posterior cerebral artery; PCF, postoperative collateral formation; PComA, posterior communicating artery.

.

**Supplemental Table 4. Subgroup analysis of predictors for postoperative collateral formation in adult patients.**

| Characteristics         | PCF             |                | p value      |              | OR (95% CI)        |
|-------------------------|-----------------|----------------|--------------|--------------|--------------------|
|                         | Good<br>(n=100) | Poor<br>(n=58) | Uni          | Multi*       |                    |
| Female sex              | 56(56.0%)       | 30(51.7%)      | 0.447        |              |                    |
| History of risk factors |                 |                |              |              |                    |
| Hypertension            | 29(29.0%)       | 18(31.0%)      | 0.284        |              |                    |
| Smoking                 | 9(9.0%)         | 5(15.5%)       | 0.349        |              |                    |
| Diabetes                | 6(6.0%)         | 2(3.4%)        | 0.263        |              |                    |
| Alcohol use             | 7(7.0%)         | 2(3.4%)        | 0.401        |              |                    |
| Hyperlipidemia          | 3(3.0%)         | 3(5.2%)        | 0.435        |              |                    |
| Thyroid disease         | 1(1.0%)         | 0(0.0%)        | 1.000        |              |                    |
| Clinical manifestation  |                 |                |              |              |                    |
| Hemorrhage              | 25(25.0%)       | 25(43.1%)      | <b>0.008</b> | <b>0.022</b> | 0.349(0.141-0.861) |
| Infarction              | 40(40.0%)       | 21(36.2%)      | 0.393        | 0.374        | 0.674(0.282-1.609) |
| Others                  | 35(35.0%)       | 12(20.7%)      |              |              |                    |
| Suzuki stage            |                 |                | 0.385        |              |                    |
| I                       | 2(2.0%)         | 0(0.0%)        |              |              |                    |
| II                      | 13(13.0%)       | 13(22.4%)      |              |              |                    |
| III                     | 40(40.0%)       | 18(31.0%)      |              |              |                    |
| IV                      | 31(31.0%)       | 13(22.4%)      |              |              |                    |
| V                       | 13(13.0%)       | 12(20.7%)      |              |              |                    |
| VI                      | 1(1.0%)         | 2(3.4%)        |              |              |                    |
| PCA involved            | 33(33.0%)       | 18(31.0%)      | 0.677        |              |                    |
| AChA dilated            | 28(28.0%)       | 26(44.8%)      | 0.078        |              |                    |
| PComA positive          | 6(6.0%)         | 9(15.5%)       | <b>0.023</b> | 0.060        | 0.305(0.089-1.050) |
| Surgical modalities     |                 |                |              |              |                    |
| DB+EDAS                 | 20(20.0%)       | 9(15.5%)       | 0.749        | 0.651        | 0.781(0.267-2.281) |

|        |           |           |       |       |                    |
|--------|-----------|-----------|-------|-------|--------------------|
| DB+EDS | 36(36.0%) | 25(43.1%) | 0.385 | 0.276 | 0.651(0.301-1.408) |
| DB     | 44(44.0%) | 24(41.4%) |       |       |                    |

---

\*Adjusted for surgical modalities. Boldface indicates statistical significance ( $p < 0.05$ ).

Abbreviations: AChA, anterior choroidal artery; DB, direct bypass; DB+EDS, direct bypass and encephalodurosynangiosis; DB+EDAS, direct bypass and encephaloduroarteriosynangiosis; CI, confidence intervals; OR, odds ratios; PCA, posterior cerebral artery; PCF, postoperative collateral formation; PComA, posterior communicating artery.

.
